# Supplementary material for: Evolution of domains and grain boundaries in graphene: a kinetic Monte Carlo simulation
Source: Royal Society of Chemistry journal article supplement (doi:10.1039/c5cp07142a), 2015-12-22
Supplement: c5cp07142a1.pdf [file c5cp07142a1.pdf]

(71.16, 36.61, 0.03) (26.68, 68.14, 0.00) (48.95, 25.29, 0.08) (66.68, 62.24, 0.06) (55.58, 39.75, -0.09) (16.36, 70.84, -0.03) (68.87, 12.48, -0.07) (47.63, 21.39, 0.01) (63.84, 46.57, -0.04) (11.64, 73.24, -0.08) (52.99, 23.80, -0.04) (29.82, 68.13, 0.06) (74.30, 24.62, -0.09) (69.37, 33.23, 0.07) (49.81, 6.50, -0.09) (43.65, 33.07, -0.06) (37.20, 18.51, 0.09) (8.69, 23.06, -0.09) (69.93, 34.55, 0.03) (67.30, 8.80, 0.08) (69.26, 37.25, -0.09) (44.48, 43.71, -0.01) (61.15, 33.67, -0.02) (37.87, 62.90, -0.03) (22.66, 12.12, -0.01) (60.69, 50.89, 0.00) (35.68, 8.62, -0.04) (10.09, 51.13, -0.06) (35.75, 48.39, 0.05) (24.00, 51.98, 0.00) (72.29, 41.11, -0.02) (67.62, 39.50, 0.05) (27.75, 4.07, -0.02) (71.47, 59.37, -0.02) (24.43, 64.22, -0.01) (38.08, 53.12, -0.03) (34.17, 66.79, -0.08) (11.34, 51.73, 0.05) (2.91, 13.44, 0.05) (20.61, 15.99, 0.05) (73.76, 2.08, -0.10) (35.73, 21.80, 0.00) (67.99, 35.38, 0.07) (55.86, 70.22, 0.10) (53.72, 73.43, 0.05) (47.72, 23.36, 0.08) (72.35, 4.00, -0.10) (57.52, 45.93, 0.01) (32.94, 44.21, 0.02) (33.57, 39.20, 0.07) (39.72, 43.84, -0.05) (48.16, 58.40, 0.05) (39.64, 0.10, -0.05) (33.36, 0.65, 0.03) (67.41, 56.89, 0.07) (9.75, 68.81, 0.00) (17.55, 16.84, -0.06) (4.05, 60.27, 0.08) (70.50, 69.23, 0.10) (69.66, 23.28, -0.06) (41.02, 33.26, -0.09) (4.24, 13.61, 0.03) (12.23, 61.86, 0.06) (0.16, 36.30, 0.09) (40.35, 64.23, 0.02) (21.33, 3.53, -0.04) (36.57, 14.62, -0.04) (53.68, 26.81, 0.09) (34.35, 24.67, -0.04) (24.17, 13.93, -0.09) (66.15, 11.25, -0.06) (0.50, 30.06, 0.05) (18.68, 63.85, 0.00) (60.94, 47.94, -0.07) (13.52, 25.61, 0.03) (26.43, 11.44, 0.01) (1.09, 44.34, -0.10) (50.66, 27.13, -0.04) (64.43, 70.83, 0.09) (50.83, 60.55, -0.01) (60.00, 44.06, -0.10) (19.47, 49.06, -0.07) (17.68, 31.57, 0.06) (31.67, 26.19, -0.01) (55.01, 55.89, 0.01) (1.62, 67.39, 0.03) (40.65, 55.83, 0.02) (12.88, 45.99, -0.03) (0.59, 63.26, -0.03) (53.25, 76.26, 0.01) (5.22, 33.29, -0.02) (17.96, 3.44, 0.09) (45.18, 26.72, -0.07) (29.30, 21.93, 0.06) (8.25, 69.17, 0.01) (60.47, 53.07, -0.08) (11.05, 58.21, 0.03) (59.38, 24.88, 0.04) (30.19, 0.22, -0.02) (64.52, 13.52, -0.05) (41.32, 58.48, 0.00) (76.28, 50.86, 0.05) (52.71, 60.53, 0.10) (17.23, 12.01, 0.00) (65.66, 7.73, 0.05) (47.44, 62.60, 0.06) (25.53, 58.03, -0.05) (75.10, 65.24, 0.05) (28.12, 59.09, 0.10) (10.87, 48.22, 0.09) (57.70, 27.24, 0.02) (9.57, 62.46, -0.04) (44.26, 38.17, 0.06) (41.53, 31.50, 0.10) (59.55, 0.55, -0.06) (48.22, 29.42, -0.02) (20.69, 60.45, -0.04) (26.55, 19.92, -0.05) (7.99, 56.66, 0.04) (14.14, 14.63, 0.04) (63.47, 68.72, -0.03) (13.58, 66.29, 0.00) (48.35, 33.89, -0.03) (50.78, 11.15, 0.09) (19.98, 27.16, -0.09) (27.20, 21.25, -0.02) (7.22, 16.45, 0.02) (62.95, 62.19, -0.06) (54.54, 29.31, 0.00) (30.33, 69.52, -0.02) (34.45, 37.17, 0.01) (28.65, 41.27, -0.05) (0.44, 3.51, 0.06) (40.82, 12.60, -0.04) (54.71, 0.93, -0.03) (58.97, 33.50, -0.07) (0.38, 1.25, 0.09) (59.07, 68.17, -0.05) (59.46, 66.61, 0.05) (67.63, 70.19, 0.07) (9.40, 66.23, 0.08) (17.48, 72.81, -0.08) (56.76, 13.80, 0.03) (0.46, 66.42, -0.05) (64.02, 18.40, -0.02) (65.77, 74.18, -0.02) (59.93, 39.48, -0.08) (11.67, 5.49, 0.08) (36.06, 74.33, 0.09) (1.70, 27.38, 0.03) (49.36, 27.77, 0.05) (8.77, 36.18, 0.02) (75.10, 52.87, 0.02) (4.90, 68.33, -0.06) (70.68, 70.56, 0.01) (7.12, 35.53, -0.05) (47.78, 37.31, 0.09) (68.58, 41.76, -0.05) (15.39, 22.29, 0.08) (12.37, 22.46, -0.02) (73.16, 66.81, -0.07) (69.24, 72.87, -0.04) (70.08, 43.74, -0.01) (57.13, 23.97, 0.04) (36.25, 56.48, 0.06) (45.39, 60.70, -0.02) (40.10, 26.33, 0.06) (9.65, 39.21, 0.10) (9.31, 76.71, 0.05) (16.61, 28.68, -0.04) (51.61, 52.66, -0.09) (63.95, 23.31, 0.07) (17.17, 47.35, -0.08) (3.41, 19.62, 0.01) (12.67, 16.61, 0.04) (59.43, 28.94, 0.04) (47.21, 43.69, 0.04) (17.15, 36.47, 0.01) (1.83, 21.98, -0.06) (41.17, 69.31, 0.07) (60.31, 3.96, 0.03) (62.95, 43.13, -0.02) (29.82, 9.86, -0.06) (52.03, 68.98, -0.08) (42.87, 50.23, 0.09) (27.28, 63.99, 0.01) (4.16, 58.37, 0.09) (28.23, 20.84, -0.06) (69.69, 69.50, 0.05) (50.73, 29.67, 0.00) (70.81, 14.25, 0.07) (47.34, 20.09, -0.05) (32.92, 54.29, 0.00) (46.18, 53.38, -0.07) (41.69, 28.64, 0.05) (58.10, 10.12, -0.09) (61.53, 49.49, 0.04) (1.79, 68.85, -0.05) (15.75, 15.26, -0.01) (45.38, 51.50, -0.03) (21.01, 52.50, 0.08) (49.09, 49.91, 0.04) (61.84, 71.10, 0.02) (61.47, 60.86, -0.05) (52.41, 4.88, 0.02) (8.47, 19.78, 0.05) (18.71, 9.14, 0.01) (23.61, 57.79, 0.06) (14.58, 20.28, 0.06) (2.77, 33.58, -0.09) (58.64, 48.18, -0.08) (12.04, 55.80, 0.00) (28.88, 33.98, -0.05) (24.83, 19.62, -0.04) (18.47, 5.17, -0.03) (6.46, 39.86, 0.00) (74.59, 13.48, 0.06) (23.88, 8.52, -0.09) (61.87, 14.46, 0.00) (36.45, 0.17, 0.05) (55.82, 30.88, 0.03) (3.38, 43.21, 0.08) (70.68, 4.19, 0.01) (62.54, 32.86, -0.03) (1.61, 10.23, 0.08) (1.98, 46.97, 0.06) (13.69, 58.17, -0.07) (69.13, 60.06, 0.07) (29.85, 8.50, 0.08) (45.78, 10.83, -0.07) (59.99, 58.46, 0.04) (52.87, 33.06, -0.09) (75.96, 43.40, -0.04) (16.44, 40.60, 0.04) (55.08, 52.08, -0.06) (75.69, 58.56, -0.05) (66.76, 63.81, -0.08) (35.27, 0.73, 0.08) (41.92, 2.54, 0.10) (11.56, 0.97, -0.01) (36.61, 7.68, -0.09) (76.12, 23.86, 0.04) (63.52, 3.34, 0.08) (39.18, 13.54, 0.06) (59.67, 26.18, -0.06) (41.88, 73.50, -0.07) (16.58, 56.06, 0.01) (55.68, 16.38, 0.07) (17.44, 21.52, -0.01) (43.43, 17.74, 0.06) (66.65, 26.30, 0.05) (12.03, 13.48, 0.05) (75.60, 56.79, 0.03) (5.72, 14.37, -0.06) (40.16, 62.56, -0.06) (25.20, 39.02, 0.06) (74.97, 48.29, -0.07) (17.67, 2.02, 0.06) (69.45, 67.26, -0.09) (27.91, 49.23, -0.09) (48.60, 62.30, 0.05) (63.43, 36.23, -0.08) (36.57, 63.70, 0.08) (52.60, 48.25, 0.05) (26.07, 9.78, 0.05) (31.53, 29.97, -0.06) (76.22, 38.64, -0.02) (35.02, 5.85, -0.07) (1.51, 34.13, 0.09) (31.44, 6.08, 0.05) (17.11, 50.91, 0.07) (0.01, 61.92, -0.01) (5.11, 11.99, -0.06) (38.55, 75.72, 0.09) (33.45, 6.45, 0.03) (60.14, 46.88, 0.09) (43.13, 55.00, -0.02) (14.71, 31.94, -0.05) (34.03, 72.20, 0.07) (48.84, 5.45, 0.01) (41.69, 42.13, -0.01) (23.63, 22.84, -0.03) (46.29, 71.29, -0.08) (70.70, 7.60, 0.01) (58.20, 51.13, -0.01) (57.01, 50.31, 0.08) (49.09, 0.89, 0.06) (20.91, 19.81, 0.01) (44.74, 47.43, 0.05) (47.10, 33.26, 0.08) (0.19, 32.11, 0.07) (67.54, 16.77, -0.08) (3.12, 21.64, 0.03) (68.46, 20.21, -0.06) (16.57, 7.17, 0.00) (28.34, 17.78, -0.04) (23.65, 71.27, 0.10) (38.41, 24.02, -0.03) (28.39, 45.84, -0.10) (50.18, 12.13, -0.10) (36.42, 15.94, -0.09) (27.29, 62.02, -0.05) (36.17, 27.11, 0.06) (54.31, 70.80, -0.02) (37.18, 21.40, -0.09) (61.61, 20.94, 0.04) (3.52, 48.03, -0.09) (27.72, 52.15, 0.09) (63.60, 76.07, -0.01) (39.58, 35.39, -0.05) (4.43, 67.94, -0.07) (1.37, 4.00, 0.04) (73.69, 11.30, -0.04) (57.52, 22.38, -0.03) (15.97, 6.00, -0.05) (44.39, 67.64, -0.05) (4.71, 19.23, -0.07) (11.06, 46.28, 0.00) (66.52, 34.99, 0.06) (46.18, 46.68, 0.04) (0.27, 57.45, -0.09) (70.27, 40.20, 0.04) (22.07, 40.50, 0.02) -0.07) (64.43, 40.82, -0.04) (10.21, 70.19, -0.03) (14.18, 11.24, 0.02) (15.74, 69.69, -0.03) (58.62, 69.67, -0.07) (3.78, 71.40, -0.01) (9.53, 46.97, 0.02) (12.50, 43.08, 0.05) (31.75, 1.35, -0.08) (13.10, 39.73, -0.03) (22.79, 10.67, 0.03) (73.14, 36.41, -0.04) (50.11, 72.41, -0.06) (75.15, 2.87, 0.09) (14.76, 48.13, 0.07) (68.85, 74.65, 0.03) (14.84, 24.52, 0.05) (16.83, 57.43, -0.05) (1.87, 1.35, 0.00) (11.29, 38.10, 0.07) (25.47, 26.91, 0.05) (20.62, 17.52, 0.00) (44.52, 15.32, -0.01) (54.89, 48.81, -0.04) (68.27, 18.37, 0.03) (65.17, 63.54, 0.08) (74.62, 17.10, -0.02) (14.25, 60.86, -0.03) (12.42, 41.14, -0.03) (20.11, 50.67, 0.04) (58.83, 63.56, -0.03) (13.98, 75.76, -0.09) (66.15, 9.63, 0.03) (29.74, 6.05, -0.05) (18.73, 66.65, 0.02) (42.65, 5.59, 0.03) (30.08, 53.33, -0.09) (74.02, 35.19, 0.10) (14.09, 21.66, -0.04) (25.28, 47.77, 0.09) (75.54, 22.49, -0.08) (44.19, 69.79, 0.04) (56.06, 37.53, 0.10) (48.97, 22.89, 0.08) (14.04, 54.00, -0.03) (71.46, 5.92, 0.04) (9.48, 42.07, -0.09) (74.34, 10.07, -0.03) (71.97, 20.17, 0.05) (60.15, 45.56, 0.05) (33.13, 70.86, 0.01) (5.64, 37.56, 0.04) (20.68, 64.59, -0.08) (55.60, 10.49, 0.07) (74.14, 71.96, 0.03) (49.90, 56.75, -0.05) (63.01, 13.39, -0.09) (45.53, 28.27, 0.09) (4.17, 29.18, -0.02) (29.49, 43.88, 0.04) (19.27, 54.07, -0.03) (54.42, 60.27, 0.03) (60.25, 14.67, -0.03) (14.39, 28.81, -0.06) (71.64, 65.26, 0.07) (71.04, 50.50, -0.10) (56.61, 25.70, 0.09) (9.08, 34.18, -0.06) (54.43, 43.53, -0.01) (55.94, 53.23, -0.02) (18.56, 14.33, 0.00) (3.83, 46.56, 0.03) (55.56, 23.57, 0.02) (36.15, 56.68, 0.07) (9.40, 48.51, -0.01) (28.29, 35.33, 0.04) (65.25, 61.99, -0.05) (48.29, 15.66, 0.09) (56.18, 46.28, 0.03) (5.61, 54.07, 0.08) (58.49, 31.59, -0.04) (39.66, 23.55, 0.06) (63.85, 32.27, 0.07) (57.02, 11.11, 0.04) (23.49, 63.03, 0.08) (19.57, 15.44, 0.04) (57.66, 29.07, -0.05) (49.58, 66.48, 0.01) (40.11, 49.29, -0.10) (39.44, 6.49, 0.00) (45.28, 6.11, 0.06) (6.27, 67.33, -0.05) (41.06, 16.36, 0.10) (40.81, 34.61, -0.04) (54.63, 33.39, 0.06) (9.94, 73.61, -0.04) (24.00, 12.06, -0.08) (45.54, 33.44, -0.08) (54.19, 10.23, -0.01) (21.83, 38.16, -0.05) (49.68, 47.71, -0.03) (45.11, 54.47, -0.06) (21.66, 1.20, 0.03) (26.15, 74.54, -0.01) (51.95, 75.64, -0.07) (54.51, 66.11, 0.04) (19.41, 18.88, -0.07) (36.62, 41.00, -0.03) (62.48, 2.38, 0.09) (2.37, 50.34, 0.10) (40.46, 3.48, -0.03) (58.58, 53.05, -0.09) (60.83, 53.62, 0.00) (52.67, 56.76, 0.07) (40.00, 41.47, 0.01) (3.73, 31.89, 0.05) (29.55, 32.40, 0.02) (30.49, 54.70, 0.03) (42.49, 53.09, -0.08) (45.44, 22.58, 0.07) (21.81, 13.93, 0.03) (65.94, 45.05, 0.05) (51.31, 28.51, 0.07) (15.30, 49.97, 0.08) (6.77, 34.18, -0.08) (52.06, 54.38, -0.07) (19.50, 72.36, 0.02) (16.67, 14.12, -0.08) (45.26, 29.78, 0.03) (49.04, 3.67, 0.06) (9.75, 26.22, -0.06) (44.09, 35.19, 0.09) (1.90, 61.34, 0.04) (73.56, 55.75, 0.00) (30.40, 54.85, -0.05) (27.00, 45.16, 0.08) (13.06, 27.16, 0.08) (68.81, 53.26, 0.00) (66.97, 13.46, 0.10) (62.70, 26.45, 0.08) (46.82, 66.88, 0.01) (11.26, 26.92, 0.00) (2.55, 15.40, 0.00) (50.99, 19.13, 0.04) (30.40, 57.90, 0.01) (51.98, 26.76, -0.06) (68.36, 34.12, -0.07) (33.43, 14.00, 0.03) (31.51, 46.62, 0.03) (9.69, 52.64, -0.05) (42.49, 76.41, 0.04) (39.98, 4.78, -0.05) (7.47, 75.88, 0.06) (22.69, 32.28, 0.08) (17.58, 28.42, -0.01) (71.72, 62.05, -0.01) (18.16, 69.47, -0.01) (20.20, 5.63, -0.08) (32.19, 12.58, 0.07) (39.45, 10.75, -0.04) (56.87, 39.41, -0.09) (51.65, 21.94, 0.09) (1.26, 8.64, 0.03) (23.58, 5.74, 0.02) (42.81, 68.07, 0.09) (21.09, 72.07, -0.01) (44.98, 52.73, -0.01) (29.23, 4.21, 0.00) (38.83, 31.88, 0.00) (50.05, 20.36, 0.02) (47.99, 10.49, 0.00) (12.33, 66.85, 0.02) (19.34, 60.18, -0.01) (8.32, 36.48, 0.01) (52.18, 10.46, 0.09) (56.60, 3.34, 0.10) (75.07, 8.29, -0.04) (57.38, 61.50, 0.08) (23.57, 56.37, -0.10) (56.78, 54.29, 0.08) (45.63, 37.74, 0.01) (18.38, 0.84, -0.06) (73.97, 63.54, 0.01) (2.53, 72.72, 0.07) (3.65, 65.59, -0.08) (61.32, 7.50, 0.02) (25.58, 50.25, 0.10) (31.64, 75.25, 0.00) (54.40, 37.93, 0.03) (61.46, 64.84, -0.06) (27.13, 40.45, 0.06) (2.94, 3.86, 0.06) (0.79, 73.15, -0.09) (26.51, 31.38, 0.07) (75.05, 37.69, 0.00) (41.74, 54.74, -0.06) (38.77, 1.62, 0.03) (62.73, 47.50, 0.07) (14.45, 5.07, -0.10) (4.58, 55.52, -0.02) (63.17, 71.84, 0.05) (45.32, 16.44, -0.01) (36.58, 70.17, 0.06) (39.89, 54.72, -0.01) (76.27, 15.99, 0.04) (64.87, 54.02, -0.02) (39.65, 44.03, -0.06) (21.66, 70.64, 0.05) (73.08, 39.66, -0.05) (18.72, 50.22, 0.09) (33.11, 35.68, -0.07) (41.85, 71.05, -0.03) (26.80, 43.14, 0.07) (35.95, 32.20, 0.06) (13.48, 6.95, -0.06) (31.75, 40.20, 0.01) (59.69, 12.58, -0.04) (43.56, 71.25, -0.07) (7.21, 6.11, 0.06) (21.51, 11.17, -0.07) (10.13, 23.49, -0.05) (55.66, 42.30, -0.01) (41.92, 39.10, 0.00) (4.33, 53.62, 0.03) (60.60, 31.25, -0.06) (44.07, 58.81, 0.04) (59.00, 5.79, 0.03) (29.23, 42.57, -0.09) (46.25, 14.04, 0.00) (52.67, 12.52, -0.03) (25.84, 64.53, 0.01) (68.54, 15.43, -0.03) (23.43, 4.12, 0.06) (15.23, 34.35, -0.09) (42.30, 22.60, -0.05) (43.66, 11.77, -0.05) (0.81, 19.02, 0.04) (51.14, 37.95, 0.05) (72.63, 50.82, -0.09) (45.44, 41.11, 0.00) (71.90, 16.85, 0.09) (38.66, 26.19, -0.03) (41.95, 30.01, -0.08) (37.71, 58.65, -0.05) (69.87, 17.60, 0.04) (70.99, 9.95, 0.06) (41.57, 44.00, -0.08) (58.06, 16.74, 0.09) (62.74, 74.61, 0.02) (22.93, 0.78, -0.02) (64.33, 19.83, 0.05) (50.84, 14.44, 0.21) (72.45, 21.72, 0.05) (38.34, 24.04, -0.05) (26.15, 62.93, 0.03) (23.64, 53.35, 0.06) (63.96, 16.51, 0.06) (9.70, 22.00, 0.05) (55.58, 20.02, -0.08) (29.46, 27.47, 0.05) (29.89, 20.75, 0.07) (11.34, 20.89, -0.06) (4.00, 34.90, -0.01) (36.08, 52.28, 0.07) (68.22, 38.09, 0.02) (55.50, 68.83, 0.05) (54.55, 15.47, 0.08) (3.64, 75.54, 0.00) (6.31, 13.05, 0.10) (76.11, 14.49, -0.06) (64.79, 22.06, 0.08) (21.11, 34.33, 0.09) (5.78, 70.47, 0.05) (67.87, 31.35, -0.02) (15.51, 30.20, 0.03) (44.69, 7.96, 0.06) (10.90, 16.66, 0.09) (28.60, 11.69, 0.05) (75.77, 1.72, -0.07) (48.11, 32.48, 0.09) (61.64, 3.44, -0.09) (26.27, 6.71, 0.03) (15.90, 66.00, 0.08) (30.59, 34.01, -0.03) (21.06, 47.36, 0.03) (54.56, 76.35, -0.09) (52.42, 29.87, -0.02) (24.55, 37.58, 0.03) (6.01, 61.23, 0.00) (52.56, 19.62, 0.09) (59.31, 2.92, 0.01) (32.52, 27.42, 0.02) (40.63, 27.83, 0.02) (52.13, 57.66, -0.02) (35.62, 44.37, 0.06) (5.91, 51.05, -0.05) (26.67, 25.91, -0.02) (36.17, 62.19, 0.01) (73.86, 14.60, 0.04) (24.60, 17.97, -0.06) (52.94, 35.48, -0.08) (64.69, 28.22, 0.08) (31.93, 2

(6.44, 4.70, -0.42) (0.48, 41.07, -0.56) (65.39, 74.89, -0.03) (56.88, 76.35, -0.24) (45.1, 40.07, 0.73) (4.40, 38.22, 0.14) (39.55, 44.81, -0.91) (5.11, 58.21, -0.13) (67.51, 46.96, -0.80) (25.00, 16.01, 0.28) (70.01, 35.46, -1.44) (40.50, 55.44, -0.35) (62.63, 39.87, -0.63) (44.46, 54.98, -0.19) (64.42, 35.96, -0.91) (26.24, 65.24, -0.54) (60.39, 15.00, 0.04) (46.61, 59.71, -0.49) (0.38, 76.44, -0.17) (27.43, 64.48, -0.60) (72.96, 74.37, -0.08) (38.66, 56.47, 0.07) (38.78, 75.89, 0.47) (49.87, 16.82, 1.01) (30.07, 30.66, 0.22) (10.51, 34.18, -0.01) (63.59, 26.01, -0.71) (42.99, 8.12, -0.23) (16.10, 0.80, 1.22) (8.77, 29.33, -0.34) (64.47, 44.71, -0.66) (74.21, 26.35, -1.17) (67.81, 34.40, -0.41) (30.87, 27.73, -0.02) (25.07, 29.66, 0.11) (10.08, 18.12, 0.01) (31.07, 60.83, -0.34) (19.50, 72.74, 1.00) (10.63, 25.51, -0.22) (4.09, 0.41, -0.34) (3.17, 40.77, 0.23) (57.05, 22.95, 0.35) (11.37, 64.22, 0.16) (5.04, 17.19, -0.38) (6.68, 51.18, 0.45) (52.05, 65.47, -0.57) (19.58, 32.47, 0.02) (31.04, 58.06, -0.08) (53.10, 10.02, 2.09) (21.03, 21.24, 0.34) (11.09, 46.39, 0.79) (4.25, 35.79, -0.22) (21.76, 33.58, 0.04) (51.45, 66.74, -0.43) (27.33, 60.20, -0.40) (15.94, 42.58, 0.24) (59.84, 2.54, 0.12) (1.61, 47.10, 0.37) (54.96, 9.81, 0.01) (60.31, 62.40, -0.20) (27.27, 2.33, 0.68) (44.89, 76.72, 0.22) (19.97, 68.59, 0.22) (26.82, 12.02, 0.21) (11.52, 59.90, 0.00) (37.51, 71.35, -0.48) (2.95, 57.17, -0.16) (6.43, 36.85, 0.20) (39.42, 67.26, 1.06) (46.43, 31.19, 0.99) (70.91, 12.94, -0.62) (47.74, 39.77, 0.52) (64.34, 39.25, -0.60) (41.97, 13.00, 0.09) (45.54, 11.57, 0.35) (21.59, 39.50, 0.00) (26.29, 9.52, 0.25) (13.61, 9.11, 0.00) (70.92, 62.42, 49.94) (1.28) (46.63, 4.41, -0.40) (68.36, 5.26, -0.41) (34.78, 62.89, -0.07) (28.69, 10.26, 0.39) (23.59, 56.62, -0.21) (58.99, 73.48, -0.56) (49.11, 57.00, -0.33) (58.67, 25.26, 0.05) (31.85, 38.03, -0.64) (46.13, 73.31, 1.99) (35.33, 9.36, 0.25) (73.97, 47.65, -0.88) (60.09, 12.50, 0.17) (71.86, 2.75, 0.56) (3.43, 6.16, -0.08) (47.60, 48.48, 0.05) (32.86, 73.89, -0.58) (4.10, 72.90, 34.29, 0.03) (51.20, 57.34, -0.16) (3.37, 23.48, -0.71) (73.64, 9.12, -0.33) (27.40, 33.25, 0.01) (27.12, 28.32, 0.23) (15.26, 63.68, 0.59) (30.20, 40.08, -2.01) (70.27, 52.97, -0.48) (70.99, 6.40, -0.35) (37.04, 6.91, -0.39) (24.88, 4.70, 0.78) (16.57, 19.02, 0.35) (46.87, 62.17, -0.37) (5.16, 39.37, 0.46) (1.05, 39.77, -0.50) (30.80, 49.54, 0.48) (6.57, 39.27, 0.61) (21.70, 1.80, 0.83) (20.28, 44.94, -0.04) (10.18, 29.26, -0.27) (2.25, 37.19, -0.44) (8.95, 0.50, -0.15) (45.59, 18.94, 1.44) (74.40, 28.83, -1.23) (32.95, 19.94, 0.46) (16.28, 64.66, 0.99) (48.83, 60.76, -0.53) (38.75, 47.22, -1.08) (7.62, 23.22, -0.38) (16.13, 6.28, 0.06) (50.06, 66.81, -0.14) (10.48, 69.48, 1.61) (42.18, 31.39, 0.80) (23.83, 62.50, -0.29) (52.54, 55.52, 0.17) (27.13, 0.23, 1.18) (72.40, 30.25, -1.37) (1.19, 61.08, -0.17) (17.55, 33.83, -0.03) (63.12, 21.01, -0.51) (74.81, 55.05, -0.29) (63.03, 75.29, 0.29) (22.29, 10.27, -0.87) (25.23, 21.29, -0.91) (20.23, 20.06, 0.37) (8.47, 35.51, 0.11) (19.43, 29.99, 0.06) (6.53, 70.05, -0.27) (61.14, 5.94, 1.00) (73.69, 45.16, -1.06) (32.11, 29.34, 0.32) (68.08, 54.42, -0.18) (13.76, 59.86, 0.04) (65.79, 27.05, -0.98) (15.08, 58.60, -0.07) (37.15, 41.41, -0.40) (72.59, 15.20, -0.70) (45.69, 41.12, 0.41) (64.62, 38.45, -0.90) (72.20, 27.76, -1.30) (51.21, 8.47, 0.22) (75.00, 57.55, -0.23) (35.44, 53.86, 0.57) (7.65, 47.73, 1.49) (20.22, 47.45, -0.16) (13.49, 36.50, 0.11) (30.95, 53.89, 0.89) (47.07, 7.19, -0.31) (29.01, 73.76, -0.54) (42.43, 72.43, 1.62) (63.29, 20.11, 1.55) (27.90, 43.31, -0.27) (33.57, 76.17, 0.07) (23.24, 70.04, -0.62) (39.42, 51.36, -0.25) (24.52, 19.76, 0.35) (28.90, 69.46, -0.80) (39.47, 1.53, 0.15) (58.41, 48.91, -0.14) (22.75, 26.08, 0.23) (68.46, 69.99, 0.02) (68.10, 12.98, -0.60) (4.10, 70.12, -0.43) (7.20, 38.04, 0.44) (27.53, 35.69, -0.23) (56.89, 29.17, 0.27) (49.94, 40.86, 0.38) (48.93, 72.68, 2.17) (54.26, 66.56, -0.62) (13.81, 51.21, -0.31) (24.06, 48.22, -0.16) (50.11, 43.33, 0.24) (69.59, 21.74, -1.05) (4.91, 50.31, 1.79) (52.92, 23.40, 1.08) (27.88, 2.54, 0.48) (40.83, 42.44, -0.20) (7.05, 35.59, 0.07) (2.69, 33.45, -0.66) (27.64, 68.80, -0.72) (46.54, 22.56, 1.55) (51.53, 43.23, 0.20) (51.12, 55.61, -0.20) (71.81, 31.55, -1.41) (75.63, 17.51, -0.72) (47.58, 37.81, 0.68) (47.73, 76.07, 0.40) (39.59, 64.41, 0.84) (70.79, 68.57, 0.12) (30.51, 13.13, -0.27) (61.26, 14.58, -0.17) (40.77, 51.92, -0.26) (23.07, 1.41, 0.75) (58.79, 71.16, -0.27) (7.34, 40.44, 0.87) (40.31, 24.15, 1.07) (49.39, 39.46, -0.49) (15.81, 62.33, 0.41) (44.09, 63.75, 2.09) (66.73, 75.41, -0.11) (46.10, 26.26, 1.31) (10.97, 30.45, -0.21) (75.62, 43.69, -0.75) (39.82, 27.83, 0.78) (71.23, 41.63, 0.14) (45.36, 9.02, -0.04) (67.66, 59.4, -0.48) (6.57, 8.25, -0.08) (12.66, 24.16, -0.05) (60.83, 18.19, 0.42) (46.30, 66.69, -0.58) (11.40, 42.70, 0.79) (30.69, 15.70, 0.44) (12.38, 8.42, 0.03) (50.31, 26.02, 1.26) (6.38, 25.76, -0.52) (52.25, 67.92, -0.44) (67.05, 18.11, -0.78) (55.86, 34.22, 0.24) (41.25, 38.79, 0.39) (25.43, 23.44, 0.30) (75.45, 0.44, -0.10) (34.38, 50.30, 0.45) (24.72, 76.39, 0.33) (11.05, 48.80, 0.37) (29.67, 23.22, 0.36) (55.08, 11.66, 0.53) (47.98, 22.46, 1.52) (40.60, 29.01, 0.78) (22.85, 48.98, -0.20) (38.04, 34.05, 0.46) (30.27, 71.64, -0.80) (30.38, 46.97, 0.02) (25.70, 28.39, 0.21) (75.08, 45.00, -0.84) (51.46, 32.10, 0.80) (1.64, 1.79, -0.10) (56.45, 67.65, -0.49) (47.95, 53.42, -0.11) (1.41, 44.66, 0.08) (58.71, 5.27, 0.45) (58.12, 20.19, 0.17) (6.49, 1.91, -0.36) (20.28, 11.61, -0.63) (30.97, 20.67, 0.41) (57.74, 15.44, 0.41) (7.47, 42.86, 1.29) (47.05, 74.18, 1.80) (55.96, 71.44, -0.41) (66.99, 3.16, -0.34) (29.25, 15.70, 0.41) (61.74, 0.63, -0.08) (41.15, 47.05, -1.17) (17.36, 9.17, -0.33) (64.30, 75.81, 0.08) (5.22, 19.65, -0.45) (32.84, 8.62, 0.32) (33.58, 15.69, 0.54) (30.99, 5.42, 0.53) (45.72, 7.59, -0.24) (51.49, 30.71, 0.69) (26.99, 25.84, 0.27) (45.63, 52.37, 0.10) (60.06, 68.65, -0.20) (54.51, 25.70, 0.78) (39.67, 25.40, 0.94) (11.23, 61.34, 0.06) (25.29, 20.96, 0.34) (9.39, 39.12, 0.63) (52.91, 51.79, -0.05) (51.52, 23.4, -0.35) (71.99, 67.79, 0.07) (1.62, 0.39, -0.20) (42.30, 70.00, 2.13) (38.45, 62.24, 0.40) (28.19, 1.16, 0.27) (16.46, 27.67, 0.01) (37.29, 58.65, 0.13) (59.46, 52.54, -0.13) (16.92, 23.93, 0.17) (9.90, 15.65, 0.07) (21.06, 76.13, 0.87) (8.92, 1.92, -0.16) (12.52, 2.70, 0.24) (43.65, 69.77, 2.04) (48.29, 3.35, 0.35) (15.92, 52.43, -0.38) (34.44, 32.96, 0.29) (23.26, 6.38, 0.31) (59.26, 32.67, -0.18) (71.24, 10.66, -0.50) (1.54, 27.33, -0.93) (65.52, 6.91, -0.39) (29.87, 64.40, -0.61) (62.68, 48.59, -0.36) (68.40, 68.56, 0.00) (58.01, 43.98, -0.15) (25.69, 39.47, -0.22) (38.43, 17.33, 0.30) (23.05, 7.66, -0.23) (8.15, 30.61, -0.32) (11.68, 20.52, 0.04) (5.41, 44.19, 1.41) (72.35, 60.33, -0.21) (0.88, 45.97, -0.07) (16.01, 45.05, 0.15) (54.74, 47.95, -0.02) (34.80, 58.67, 0.04) (69.60, 30.48, 1.36) (74.68, 6.93, -0.13) (25.20, 43.17, -0.15) (70.40, 47.19, -0.56) (31.53, 28.13, 0.32) (24.40, 46.78, -0.20) (70.72, 57.92, -0.27) (75.82, 28.72, -1.13) (54.13, 16.44, 0.57) (23.32, 35.95, -0.03) (13.73, 53.59, -0.39) (69.67, 54.27, -0.40) (35.97, 21.79, 0.50) (56.40, 41.62, -0.02) (61.45, 33.72, -0.51) (10.18, 75.08, 0.06) (0.62, 34.5, 5.19, -0.08) (59.68, 55.00, -0.13) (13.89, 65.73, 0.31) (20.21, 16.36, 0.28) (5.21, 4.06, -0.33) (31.49, 30.61, -0.27) (5.27, 67.95, -0.28) (18.81, 20.13, 0.36) (18.12, 63.23, 0.88) (11.18, 48.44, 0.12) (55.23, 73.26, -0.65) (37.08, 0.96, 0.59) (48.18, 68.08, 0.76) (36.02, 56.65, -0.17) (58.82, 45.16, -0.20) (68.93, 46.86, -0.01) (45.37, 36.22, 0.77) (66.85, 15.60, -0.66) (13.75, 1.99, 0.42) (13.90, 21.63, 0.14) (13.18, 45.12, 0.51) (29.40, 18.22, 0.40) (59.08, 56.29, -0.13) (36.76, 50.16, -0.06) (37.56, 10.55, 0.43) (0.51, 12.68, -0.44) (31.74, 7.73, 0.42) (17.42, 49.95, -0.29) (61.53, 12.32, -0.05) (43.52, 53.85, -0.16) (37.26, 4.59, -0.21) (69.88, 8.65, -0.46) (54.69, 74.15, -0.18) (65.41, 72.13, -0.10) (54.55, 45.49, 0.02) (31.63, 32.08, 0.12) (42.65, 27.69, 1.01) (54.34, 51.69, -0.06) (74.20, 76.49, -0.10) (38.82, 35.23, 0.46) (9.73, 13.18, 0.08) (68.98, 23.03, -0.10) (66.94, 48.26, -0.66) (25.33, 8.45, 0.22) (9.29, 16.93, -0.01) (70.39, 31.67, -0.41) (36.97, 51.55, 0.16) (21.55, 62.16, -0.07) (20.52, 13.96, -0.06) (24.66, 22.24, 0.32) (56.58, 11.87, 0.60) (25.20, 41.74, -0.20) (42.81, 30.13, 0.88) (60.36, 21.30, -0.16) (23.79, 51.99, -0.15) (56.14, 39.36, -0.39) (11.32, 1.96, 0.14) (35.43, 25.52, 0.54) (43.39, 12.91, 0.60) (46.65, 3.26, -0.72) (38.67, 32.78, 0.54) (69.33, 72.24, 0.03) (0.37) (27.26, 30.79, 0.15) (17.82, 16.53, 0.34) (64.62, 14.53, -0.45) (69.43, 51.80, -0.54) (11.39, 74.36, 0.29) (10.53, 52.42, -0.36) (7.36, 9.50, -0.05) (68.24, 54.37, -0.36) (1.97, 5.93, 0.04) (7.97, 28.15, -0.41) (65.61, 57.05, -0.24) (57.28, 25.41, 0.29) (25.48, 1.98, 0.63) (26.54, 73.37, -0.57) (41.31, 42.15, 0.32) (42.12, 47.83, -0.27) (56.37, 17.95, 0.41) (1.62, 74.34, -0.31) (3.56, 25.95, -0.75) (20.45, 73.75, 0.80) (26.25, 13.36, 0.19) (61.84, 38.69, -0.56) (8.95, 68.59, -0.01) (32.70, 76.55, 0.06) (30.80, 40.95, -1.13) (55.04, 59.05, -2.37) (61.49, 51.15, -0.22) (13.75, 70.05, 0.62) (21.54, 54.94, -0.22) (15.52, 35.18, -0.02) (33.35, 52.45, 0.69) (39.94, 55.61, 0.01) (60.84, 43.76, -0.37) (20.28, 7.81, 0.08) (61.57, 65.00, -0.39) (24.52, 11.13, -0.23) (25.63, 72.23, -0.60) (39.00, 37.66, 0.30) (53.93, 5.11, 0.36) (17.31, 70.89, 1.07) (72.80, 35.22, -1.41) (5.07, 63.86, -0.09) (14.91, 36.45, 0.05) (41.59, 8.31, -0.24) (21.39, 57.33, -0.16) (43.49, 39.97, 0.44) (63.59, 10.85, -0.28) (71.70, 52.86, -0.50) (38.55, 30.32, 0.59) (19.73, 34.96, 0.01) (71.74, 76.58, -0.12) (22.14, 5.47, 0.38) (17.44, 64.20, 1.16) (55.84, 19.29, 0.48) (41.56, 97.8, -0.16) (37.75, 3.28, -0.03) (3.18, 21.01, -0.65) (19.45, 63.47, 0.39) (35.35, 2.69, 0.47) (42.00, 17.94, 0.66) (57.63, 39.04, -0.09) (46.23, 17.69, 1.36) (72.35, 12.74, -0.58) (58.00, 70.00, -0.32) (34.72, 72.47, -1.21) (76.22, 10.36, -0.32) (35.20, 18.09, 0.36) (75.84, 6.14, -0.01) (72.28, 51.56, -0.60) (73.01, 20.91, 0.94) (26.44, 69.56, -0.79) (10.16, 67.84, 0.11) (25.98, 33.32, 0.06) (76.03, 22.47, -0.92) (45.64, 11.90, 0.51) (49.18, 39.68, 0.49) (22.40, 75.74, 0.59) (0.39, 72.22, -0.29) (19.55, 51.18, -0.30) (66.03, 38.33, -1.07) (15.42, 12.98, 0.17) (56.92, 13.27, 0.53) (53.23, 17.48, 0.60) (38.36, 65.07, 0.63) (2.90, 3.85, -0.05) (74.26, 51.13, -0.65) (12.59, 12.75, 0.51) (11.37, 68.58, 0.24) (41.27, 14.21, 0.82) (60.43, 38.81, -0.39) (74.20, 75.97, -0.12) (65.75, 50.83, -0.44) (3.92, 30.88, -0.65) (71.20, 24.09, -1.16) (22.23, 60.88, -1.15) (58.47, 6.66, 0.69) (7.43, 20.76, -0.31) (55.61, 40.44, 0.07) (74.24, 72.19, -0.10) (42.32, 5.79, -0.48) (44.53, 23.92, 1.42) (73.26, 65.57, -0.06) (19.89, 15.20, 0.68) (61.74, 62.30, -0.18) (41.64, 71.26, 1.82) (1.72, 50.94, 0.13) (35.93, 33.77, 0.22) (11.78, 47.59, 0.47) (18.32, 5.34, 0.19) (4.87, 14.72, -0.30) (0.32, 29.91, -1.06) (2.63, 60.99, -0.13) (54.45, 19.55, 0.17) (63.60, 5.68, -0.23) (29.61, 60.16, -0.35) (19.90, 37.46, 0.01) (53.12, 25.82, 0.98) (7.08, 15.82, -0.16) (32.76, 12.16, 0.33) (38.28, 18.41, -0.57) (54.81, 56.59, -0.17) (47.64, 12.91, 0.47) (18.19, 48.75, -0.22) (18.50, 26.32, 0.13) (73.16, 61.54, 0.59) (26.32, 74.70, -0.26) (7.12, 6.24, -0.29) (57.86, 67.55, -0.36) (7.66, 10.83, -0.09) (35.49, 49.53, 0.05) (75.64, 4.47, 0.04) (29.87, 62.98, -0.54) (67.61, 31.91, -1.26) (54.42, 69.05, -0.56) (34.44, 44.05, -0.62) (19.59, 46.18, -0.09) (75.21, 60.03, -0.20) (11.63, 52.43, -0.31) (56.25, 21.79, 0.49) (27.43, 63.06, -0.56) (54.08, 20.91, 0.85) (45.50, 62.29, -0.23) (70.01, 50.50, -0.66) (44.02, 47.47, -0.40) (49.48, 44.61, 0.18) (66.70, 45.79, -0.81) (65.81, 59.52, -0.22) (59.66, 28.90, -0.17) (0.85, 6.77, 0.01) (40.21, 3.79, -0.52) (60.08, 4.96, 0.22) (39.23, 68.66, 1.04) (73.22, 40.10, -1.30) (70.75, 70.73, 0.03) (11.67, 21.47, 0.27) (17.57, 68.13, -0.49) (8.05, 19.48, -0.21) (9.88, 8.45, 0.02) (26.06, 53.85, 0.02) (33.42, 6.94, 0.50) (27.77, 70.72, -0.53) (2.83, 49.26, 1.63) (11.32, 15.57, 0.17) (61.63, 27.46, -0.46) (44.75, 73.31, 1.73) (40.28, 19.59, -0.22) (60.85, 69.85, -0.14) (41.05, 36.35, 0.57) (43.23, 1.70, -0.07) (4.88, 62.52, 0.05) (0.72) (7.4, 7.07, -0.30) (58.14, 72.40, -0.40) (28.63, 17.00, 0.39) (47.32, 66.96, 0.61) (37.76, 15.35, 1.07) (23.80, 32.21, 0.07) (39.73, 16.65, 0.64) (37.37, 39.49, -1.12) (49.71, 14.36, 0.59) (5.51, 46.61, 1.83) (73.59, 18.89, -0.86) (11.34, 72.93, 0.30) (24.94, 27.19, 0.23) (25.21, 32.13, 0.07) (49.47, 19.40, -0.56) (18.81, 20.13, 0.36) (18.12, 63.23, 0.88) (11.15, -0.21) (72.43, 39.01, -1.39) (67.76, 49.44, -0.63) (53.75, 44.31, 0.08) (12.48, 21.70, 0.04) (62.56, 22.33, -0.48) (3.30, 43.19, 0.66) (49.08, 28.89, 0.61) (0.44, 2.51, 0.00) (63.63, 34.78, -0.81) (69.40, 27.93, -0.14) (36.95, 36.70, 0.14) (36.95, 36.98, 0.07) (72.60, 32.73, -1.41) (51.36, 40.76, 0.33) (60.66, 49.98, -0.12) (16.94, 35.11, -0.02) (30.56, 1.67, 0.27) (53.89, 75.45, 0.01) (28.52, 56.67, -0.05) (45.99, 46.06, 0.02) (6.52, 58.22, -0.13) (39.20, 40.06, 0.03) (45.77, 61.71, 2.05) (59.88, 66.16, -0.23) (57.06, 57.67, -0.16) (45.45, 54.81, 0.19) (58.23, 37.75, -0.13) (62.28, 69.76, -0.11) (10.10, 2.68, -0.01) (32.22, 42.96, -0.35) (36.62, 34.11, 0.36) (39.69, 54.13, 0.03) (26.51, 43.90, -0.18) (30.82, 43.16, -0.30) (42.

(56.27, 65.17, -0.47) (8.41, 24.40, -0.35) (48.99, 37.21, 0.64) (27.29, 58.78, -0.29) (11.71, 50.00, 0.01) (18.07, 10.43, -0.42) (61.37, 9.83, 0.06) (8.96, 72.91, -0.07) (19.13, 25.05, 0.20) (32.33, 62.91, -0.37) (74.79, 63.71, -0.19) (13.53, 16.71, 0.28) (41.91, 51.07, -0.56) (0.76, 17.45, -0.66) (65.56, 24.56, -0.89) (15.04, 61.12, 0.19) (9.30, 58.64, -0.14) (29.70, 36.79, -0.51) (40.22, 49.22, -1.06) (11.58, 40.26, 0.61) (28.62, 62.30, -0.53) (0.87, 37.32, -0.73) (8.93, 31.79, -0.22) (14.75, 33.98, -0.06) (63.03, 27.32, -0.66) (11.38, 65.67, 0.18) (20.85, 29.91, 0.10) (45.87, 0.90, -0.25) (0.15, 57.43, -0.20) (57.60, 1.78, 0.22) (26.48, 71.00, -0.73) (74.50, 66.36, -0.08) (67.18, 2.77, -0.12) (20.10, 67.21, 0.15) (65.63, 6.90, -0.41) (24.20, 14.84, 0.16) (50.73, 71.49, 1.08) (17.11, 37.60, 0.05) (40.15, 74.51, -0.59) (72.01, 49.09, -0.83) (3.79, 64.51, -0.15) (1.11, 8.16, -0.12) (54.44, 14.03, 0.53) (12.55, 32.85, -0.10) (51.56, 76.56, 0.00) (12.54, 62.08, 0.16) (65.06, 43.42, -0.78) (75.77, 65.81, -0.14) (67.04, 42.00, -1.05) (33.59, 66.40, -0.60) (64.25, 68.36, -0.18) (24.80, 58.82, -0.27) (20.11, 54.91, -0.23) (8.99, 45.24, 1.34) (24.80, 24.71, 0.28) (57.49, 62.60, -0.30) (33.53, 56.60, 0.19) (19.55, 43.71, 0.02) (31.34, 11.99, 0.35) (34.83, 67.06, -0.57) (70.60, 34.16, -1.45) (27.84, 71.54, -0.76) (48.90, 26.11, 1.32) (63.96, 63.39, -0.18) (53.57, 41.84, 0.16) (18.23, 73.16, 1.35) (68.75, 11.68, -0.56) (48.73, 23.65, 1.45) (65.28, 45.89, -0.68) (12.53, 72.21, 0.54) (50.13, 23.56, 1.36) (29.95, 67.25, -0.79) (73.61, 27.65, -1.24) (72.21, 36.52, -1.43) (48.83, 5.65, -0.40) (44.32, 38.53, 0.88) (39.87, 14.15, 0.98) (6.20, 23.30, -0.49) (70.22, 37.96, -0.42) (66.27, 8.10, -0.44) (73.01, 37.70, -1.37) (45.06, 42.39, 0.27) (59.45, 35.15, -0.25) (37.21, 62.91, 0.30) (24.82, 13.55, 0.06) (61.26, 48.69, -0.27) (34.80, 10.71, 0.33) (9.54, 51.21, 0.03) (36.12, 46.01, -0.83) (23.68, 53.49, -0.17) (71.47, 44.12, -1.23) (62.04, 41.17, -0.54) (28.62, 4.90, 0.59) (69.90, 56.74, 0.30) (24.99, 66.40, -0.43) (42.07, 54.18, -0.11) (36.10, 69.13, -0.78) (9.66, 48.85, 0.66) (3.40, 14.00, 14.19, -0.68) (72.99, 0.53, -0.10) (36.07, 24.26, 0.62) (66.25, 40.82, -1.02) (55.83, 68.94, -0.52) (51.88, 74.09, 0.53) (48.45, 18.79, 1.42) (73.05, 1.96, -0.10) (56.78, 46.55, -0.09) (32.78, 48.32, 0.17) (33.00, 44.10, -0.44) (39.15, 50.00, -0.58) (50.80, 59.36, -0.45) (42.88, 74.76, 0.96) (32.94, 2.18, 0.42) (63.36, 55.98, -0.20) (9.98, 62.04, 0.04) (18.00, 18.96, 0.37) (8.43, 59.86, -0.07) (64.90, 67.07, -0.18) (69.98, 26.69, -1.25) (40.09, 32.72, 0.64) (2.68, 13.62, -0.40) (19.90, 64.84, 0.26) (1.23, 42.22, -0.22) (34.77, 64.30, 0.14) (19.95, 3.54, 0.65) (35.84, 16.81, 0.56) (55.31, 26.86, 0.61) (53.25, 20.56, 0.37) (18.64, 17.69, 0.37) (64.42, 12.03, -0.37) (1.73, 29.80, -0.91) (19.07, 66.15, 0.31) (59.02, 47.62, -0.18) (14.25, 26.56, 0.05) (28.48, 14.44, 0.37) (2.70, 44.47, 0.64) (51.10, 27.19, 1.13) (60.41, 73.56, -0.36) (49.03, 63.23, -0.43) (60.24, 45.05, -0.30) (23.86, 40.97, -0.10) (17.40, 31.34, -0.03) (34.02, 25.55, 0.46) (52.80, 57.97, -0.20) (2.65, 66.66, -0.28) (41.54, 55.58, -0.10) (15.27, 43.83, 0.10) (71.10, 62.96, -0.14) (53.96, 72.88, -0.15) (6.11, 31.97, -0.37) (1.93, 33.16, 1.12) (46.88, 27.47, 1.23) (25.57, 25.91, 0.26) (8.95, 70.02, -0.03) (63.73, 52.22, -0.29) (10.75, 58.68, -0.13) (60.84, 26.28, -0.32) (31.91, 1.21, 0.26) (64.04, 15.85, -0.44) (38.50, 60.83, 0.23) (19.33, 56.56, 0.59) (53.04, 60.44, -0.44) (19.43, 10.48, -0.78) (73.72, 10.54, -0.42) (58.56, 58.30, -0.43) (27.27, 55.98, -0.05) (68.19, 63.03, -0.17) (26.11, 60.94, -0.41) (11.78, 45.15, 0.76) (61.83, 29.94, -0.53) (7.45, 62.19, -0.02) (42.46, 36.40, 0.68) (42.02, 28.95, 0.88) (56.22, 1.71, 0.40) (47.11, 41.05, 0.43) (20.15, 62.25, 0.09) (27.35, 19.58, 0.37) (6.50, 55.89, -0.27) (15.95, 9.27, -1.16) (64.97, 92.49, -0.10) (11.10, 66.40, 0.11) (46.79, 36.13, 0.76) (52.20, 1.14, -0.04) (20.55, 24.97, 0.23) (28.77, 19.51, 0.39) (7.69, 14.54, -0.08) (59.30, 58.75, -0.16) (54.89, 30.59, 0.52) (73.28, 67.12, -0.79) (34.08, 39.15, -0.40) (32.51, 36.77, -0.34) (1.71, 4.55, 0.07) (39.68, 9.49, 0.10) (56.25, 4.12, 0.49) (58.05, 35.28, -0.06) (75.42, 74.34, -0.17) (58.64, 68.73, -0.29) (60.67, 67.36, 0.19) (61.81, 75.87, -0.05) (7.72, 67.89, -0.10) (17.72, 74.51, 1.36) (55.56, 16.72, 0.51) (73.20, 68.55, 0.03) (64.30, 18.37, -0.55) (59.55, 75.66, -0.73) (57.82, 41.51, -0.13) (7.75, 76.49, -0.27) (37.02, 72.75, -0.37) (7.80, 25.69, -0.42) (50.50, 28.47, -0.10) (11.29, 35.37, 0.08) (74.58, 52.58, -0.43) (6.51, 68.62, -0.22) (67.04, 68.18, -0.12) (6.28, 34.42, -0.14) (44.90, 39.93, 0.50) (73.15, 46.48, -1.03) (16.12, 22.75, 0.19) (9.65, 21.87, -1.07) (70.79, 65.63, -0.01) (69.56, 70.80, 0.09) (69.25, 43.07, -1.19) (54.31, 23.29, 0.86) (37.22, 54.37, 0.25) (44.32, 58.78, -0.33) (44.37, 21.46, 1.44) (9.25, 36.69, 0.28) (11.37, 0.53, 0.18) (17.24, 28.87, 0.01) (48.24, 55.86, -0.26) (62.80, 24.83, -0.58) (15.32, 46.29, 0.12) (0.96, 19.91, -0.75) (14.34, 17.90, 0.30) (59.07, 30.20, -0.10) (48.05, 44.70, 0.18) (19.13, 36.25, 0.01) (74.01, 23.87, -1.08) (43.81, 66.05, 1.48) (57.17, 7.10, 1.02) (63.06, 44.82, -0.53) (31.13, 10.56, 0.32) (47.83, 65.73, 0.13) (45.57, 49.90, -0.04) (23.66, 61.06, -0.26) (8.67, 57.29, -0.22) (23.24, 22.33, 0.32) (68.47, 56.84, -0.29) (51.29, 29.64, 0.97) (68.88, 14.20, -0.67) (47.81, 20.03, 1.53) (32.21, 54.56, 0.46) (40.92, 46.93, 1.62) (41.86, 26.52, 1.04) (58.15, 14.05, 0.39) (64.93, 49.66, -0.45) (1.66, 70.16, -0.43) (15.58, 15.41, 0.32) (48.39, 49.67, 0.03) (19.42, 53.67, -0.28) (48.59, 52.13, -0.05) (62.39, 72.18, 0.01) (63.57, 58.44, -0.11) (54.11, 2.65, 0.35) (7.87, 17.01, -0.14) (21.43, 9.19, -1.10) (23.59, 58.09, -0.21) (4.66, 43.04, 0.14) (14.52, 20.36, 0.23) (0.69, 34.85, -0.91) (56.99, 49.01, -0.09) (12.93, 57.36, -0.20) (29.58, 34.38, -0.11) (25.15, 18.48, 0.35) (19.45, 11.97, -0.70) (5.02, 36.95, 0.05) (73.40, 16.39, -0.74) (23.64, 10.05, -0.49) (59.55, 13.83, 0.20) (36.74, 2.33, 0.32) (57.67, 30.34, 0.11) (2.57, 42.05, 0.23) (67.08, 4.63, -0.40) (60.05, 33.85, -0.31) (1.06, 71.27, -0.34) (2.80, 46.86, 1.10) (8.86, 64.27, 0.73) (23.54, 62.90, -0.11) (29.34, 7.30, 0.52) (46.20, 15.30, 0.96) (57.28, 60.13, -0.23) (53.22, 36.91, 0.40) (0.67, 43.52, -0.31) (15.05, 38.92, 1.19) (56.60, 52.76, -0.08) (5.86, 60.35, -0.04) (66.62, 60.70, -0.21) (32.63, 3.57, 0.52) (42.52, 76.08, 0.54) (13.78, 0.56, 0.58) (37.78, 5.76, -0.86) (75.62, 26.25, -1.08) (62.11, 3.74, -0.04) (44.09, 14.14, 0.71) (59.45, 26.43, -0.10) (43.85, 72.22, 1.83) (15.79, 57.36, -0.17) (53.19, 57.36, -0.17) (42.30, 19.24, 0.14) (43.41, 17.84, -0.98) (64.01, 30.99, -0.85) (11.94, 14.28, 0.20) (72.96, 59.01, 0.02) (8.92, 12.02, 0.03) (36.01, 62.20, 0.11) (25.49, 37.03, -0.15) (76.17, 48.64, -0.41) (15.00, 76.64, 0.95) (66.33, 66.96, -0.15) (25.39, 48.84, -0.04) (51.84, 63.01, -0.57) (61.64, 36.20, -0.55) (36.04, 60.78, -0.08) (52.08, 50.62, -0.02) (27.67, 9.19, 0.42) (33.53, 29.29, 0.36) (75.19, 38.75, -1.06) (34.51, 6.90, 0.36) (2.09, 34.73, -0.67) (30.39, 8.27, 0.44) (17.34, 52.41, -0.35) (74.41, 67.81, -0.07) (4.70, 12.23, -0.23) (37.72, 74.96, 0.31) (33.43, 10.92, 0.27) (60.44, 47.52, -0.26) (40.90, 53.33, -0.09) (16.78, 32.63, 0.35) (34.99, 71.12, -1.48) (49.54, 1.00, -0.81) (38.56, 45.84, -1.07) (23.09, 19.87, 0.36) (44.44, 70.92, 1.19) (66.48, 70.59, -0.47) (58.63, 51.37, -0.12) (61.71, 53.61, -0.18) (50.09, 76.60, -0.13) (20.06, 17.62, 0.30) (43.79, 44.89, -0.05) (43.32, 37.52, 0.64) (1.91, 22.27, -0.83) (66.51, 19.43, -0.79) (1.95, 23.57, -0.83) (68.72, 20.62, 0.98) (13.93, 10.51, 0.05) (27.20, 17.08, 0.36) (23.23, 71.49, -0.32) (40.21, 21.76, 0.84) (28.14, 45.70, -0.07) (50.74, 10.82, 0.21) (37.24, 16.62, 0.69) (26.19, 62.38, -0.48) (35.57, 27.98, 0.48) (53.83, 70.33, -0.43) (33.26, 24.34, 0.45) (64.77, 23.37, -0.77) (4.84, 47.87, 1.94) (29.74, 54.60, 0.31) (16.23, 74.40, 1.30) (59.35, 0.26, -0.42) (38.19, 36.49, 0.33) (75.45, 62.47, -0.20) (4.09, 1.82, -0.30) (72.55, 11.31, -0.50) (59.23, 23.95, -0.03) (17.56, 6.61, -0.06) (44.09, 68.45, 1.80) (3.80, 19.73, -0.56) (11.40, 43.95, 0.94) (68.23, 39.39, -1.27) (47.42, 45.99, 0.10) (75.87, 46.16, -0.58) (70.44, 40.45, -1.37) (21.55, 52.52, -0.25) (64.84, 40.93, -0.86) (10.16, 72.18, 0.11) (9.51, 71.76, 0.05) (73.19, 68.64, 0.46) (61.01, 72.33, 0.14) (2.88, 70.84, -0.45) (9.71, 46.44, 1.11) (13.11, 42.67, 0.58) (34.30, 1.75, 0.44) (10.15, 70.75, 0.11) (48.29, 12.44, -0.19) (74.21, 35.09, -0.29) (50.26, 72.65, 1.68) (73.23, 4.85, -0.13) (13.90, 46.33, 0.29) (66.32, 69.43, -0.19) (14.08, 24.09, 0.03) (13.61, 61.08, 0.13) (5.26, 2.61, -0.35) (11.44, 37.82, 0.34) (31.09, 23.16, 0.39) (14.00, 12.97, 0.20) (44.08, 16.59, 0.98) (54.13, 49.23, -0.03) (70.54, 16.61, -0.80) (66.52, 62.09, -0.19) (73.81, 21.39, -0.98) (11.67, 59.78, 0.00) (15.18, 41.38, 0.30) (22.45, 51.40, -0.21) (38.29, 63.78, -0.29) (17.49, 2.90, 0.68) (67.93, 10.47, -0.52) (29.65, 5.25, 0.05) (18.68, 69.04, 0.48) (41.58, 3.43, -0.30) (31.02, 56.65, 0.10) (76.20, 33.67, -1.07) (14.70, 22.82, 0.12) (20.16, 52.46, -0.28) (76.22, 24.95, -1.00) (47.71, 69.27, 1.36) (54.01, 38.09, 0.28) (50.73, 22.73, 1.23) (13.13, 71.66, 56.13, -0.28) (72.35, 8.49, -0.36) (8.76, 40.37, 0.85) (76.18, 8.96, -0.22) (69.19, 25.51, -1.18) (56.59, 44.09, -0.06) (33.75, 70.43, -1.55) (2.86, 35.90, -0.44) (21.04, 69.52, 1.04) (17.93, 70.77, 0.09) (54.54, 56.91, -0.30) (62.37, 13.49, -0.19) (46.26, 28.74, 1.13) (3.74, 28.42, -0.73) (30.00, 42.02, -0.60) (15.16, 53.64, -0.38) (53.62, 59.14, -0.33) (61.81, 14.82, -0.15) (15.20, 30.22, -0.09) (68.86, 61.77, -0.19) (73.97, 53.89, -0.38) (56.49, 24.25, 0.45) (8.31, 33.07, -0.15) (51.70, 45.70, 0.10) (56.83, 55.21, -0.11) (18.46, 15.26, 0.24) (3.40, 45.59, 1.14) (50.02, 21.01, 1.34) (32.32, 66.48, 0.63) (9.01, 47.67, 1.12) (28.17, 34.43, -0.13) (63.13, 56.07, -0.17) (47.83, 14.17, 0.65) (56.17, 47.84, -0.06) (8.68, 54.82, -0.32) (59.85, 31.38, -0.25) (42.35, 22.82, 1.25) (66.61, 37.02, -1.16) (55.81, 14.23, 0.58) (52.55, 64.58, -0.14) (22.77, 14.99, 0.12) (57.08, 31.63, 0.17) (44.17, 50.00, -0.29) (37.68, 8.15, -0.20) (45.61, 2.28, -0.48) (5.16, 66.53, -0.19) (41.93, 15.47, 0.76) (23.25, 43.77, 0.76) (23.05, 34.45, 0.54) (8.97, 74.34, -0.10) (25.91, 10.89, 0.80) (45.13, 33.70, 0.87) (52.63, 8.67, 0.47) (26.32, 40.77, -0.32) (50.64, 50.73, -0.01) (43.37, 51.24, -0.33) (21.94, 71.94, 0.14) (28.76, 75.14, -0.28) (52.42, 75.37, 0.15) (51.24, 64.29, -0.55) (15.94, 20.30, 0.29) (44.38, 41.62, -0.47) (65.71, 2.51, -0.27) (2.05, 53.45, -0.08) (39.13, 1.90, -0.16) (2.55, 8.51, -0.14) (67.64, 55.66, -0.31) (23.14, 54.23, -0.11) (39.43, 42.41, -0.41) (4.53, 29.60, -0.63) (28.03, 31.98, 0.10) (29.76, 56.00, 0.12) (43.60, 48.78, -0.74) (48.61, 21.18, 1.49) (19.68, 12.83, -0.26) (67.27, 44.49, -0.94) (54.70, 28.14, 0.66) (15.30, 48.74, -0.13) (9.09, 34.25, -0.02) (50.26, 54.47, -0.15) (21.72, 73.34, 0.36) (13.57, 10.59, -0.04) (47.05, 29.92, 1.07) (49.28, 3.32, -0.92) (10.82, 27.98, -0.25) (40.85, 33.92, 0.66) (1.34, 63.58, -0.10) (31.66, 56.54, 0.19) (30.25, 44.10, 1.19) (14.42, 29.03, -0.10) (67.10, 50.73, -0.51) (66.05, 14.40, -0.56) (68.19, 30.61, -1.28) (45.97, 67.05, 1.01) (12.22, 27.91, -0.18) (75.82, 19.99, -0.83) (52.08, 19.71, 1.02) (32.31, 60.12, -0.21) (52.51, 27.10, 1.00) (70.80, 36.65, -1.45) (35.63, 14.35, 0.75) (31.06, 45.66, -0.17) (8.75, 52.38, -0.15) (44.28, 74.54, 1.20) (38.88, 5.55, -1.66) (5.32, 76.45, -0.28) (54.25, 30.86, 0.16) (13.23, 29.04, 24.49, 0.32) (3.21, 59.69, -0.12) (16.16, 70.11, 0.88) (18.07, 7.90, -0.37) (39.78, 11.77, 0.68) (41.08, 9.55, 0.09) (60.63, 41.28, -0.39) (52.11, 22.25, 1.18) (2.47, 11.12, -0.28) (24.60, 6.07, 0.61) (43.22, 64.82, 1.82) (20.91, 70.94, 0.26) (44.14, 52.50, -0.18) (28.91, 3.51, 0.51) (44.22, 30.08, 0.96) (50.67, 9.67, 1.19) (47.77, 70.38, 0.14) (12.60, 67.86, 0.32) (20.07, 59.77, -0.06) (6.95, 48.96, 1.41) (55.85, 7.55, 1.15) (75.48, 1.85, -0.03) (55.86, 60.23, -0.29) (22.22, 56.17, -0.20) (55.40, 55.30, -0.12) (44.66, 35.01, 0.83) (18.47, 0.11, 1.53) (0.58, 62.37, -0.19) (1.62, 72.92, -0.35) (73.42, 64.10, -0.13) (59.26, 11.34, 0.40) (26.11, 52.46, 0.08) (31.16, 75.57, -0.16) (13.63, 38.96, 0.29) (62.53, 63.49, -0.18) (28.33, 39.34, -0.74) (4.00, 4.77, -0.16) (75.45, 72.92, -0.19) (29.17, 26.98, 0.29) (4.54, 40.64, 0.56) (40.78, 58.13, -0.63) (38.45, 0.56, 0.37) (62.47, 46.12, -0.44) (14.86, 4.15, 0.26) (4.35, 57.05, -0.18) (69.22, 75.19, -0.11) (45.49, 16.51, 1.13) (57.18, 68.52, -0.13) (34.54, 51.70, 0.58) (75.01, 18.80, -0.81) (71.44, 50.40, -0.71) (36.54, 42.69, -0.63) (24.21, 69.54, -1.50) (74.41, 37.57, -1.23) (18.11, 51.19, -0.33) (33.81, 34.23, 0.15) (44.71, 63.47, 0.16) (28.53, 41.99, -0.47) (37.90, 31.58, 0.52) (14.89, 6.96, -0.05) (32.91, 41.72, -0.43) (55.59, 8.62, 1.76) (45.47, 68.28, 1.52) (9.89, 7.02, 0.00) (22.55, 12.61, 0.34) (8.23, 21.94, -0.29) (55.79, 42.91, 0.00) (38.08, 20.63, 0.25) (2.18, 55.96, -0.17) (65.81, 28.50, -0.78) (44.83, 57.45, -0.31) (55.51, 2.87, 0.48) (28.84, 44.46, -0.17) (48.38, 16.50, 1.11) (54.41, 10.46, 0.91) (22.56, 63.17, -0.16) (66.25, 16.91, -0.67) (22.42, 4.12, 0.70) (15.36, 32.70, -0.08) (41.49, 19.26, 0.44) (44.10, 11.67, 0.41) (3.98, 22.20, -0.63) (49.78, 38.40, 0.54) (71.17, 47.92, -0.93) (45.84, 43.59, 0.19) (73.22, 22.69, -1.06) (61.71, 24.08, 1.20) (44.06, 27.63, 1.10) (32.30, 58.71, -0.09) (41.19, 16.
